# Supplementary material for: Multiple deformation mechanisms in the stone of a sea urchin tooth
Source: Royal Society of Chemistry journal article supplement (doi:10.1039/c6ce00984k), 2016-01-01
Supplement: c6ce00984k1.pdf [file c6ce00984k1.pdf]

## Supporting Materials

### Multiple deformation mechanisms in the stone of sea urchin tooth

Xinqiao Zhu<sup>†a</sup>, Shengnan Wang<sup>†a</sup>, Xiaohui Yan<sup>b</sup>, Qiyang Li<sup>c</sup> and Xiaoxiang Wang<sup>a\*</sup>

<sup>a</sup>School of Materials Science and Engineering, Zhejiang University, Hangzhou 310027, China

<sup>b</sup>Department of Mechanical and Automation Engineering, The Chinese University of Hong Kong, Shatin, N.T., Hong Kong, China

<sup>c</sup>School of Aeronautics and Astronautics, Zhejiang University, Hangzhou 310027, China

<sup>†</sup>These authors contributed equally.

\*Corresponding author. Tel: +86 0571 87952255. Fax: +86 571 87952255.

E-mail: msewangxx@zju.edu.cn.

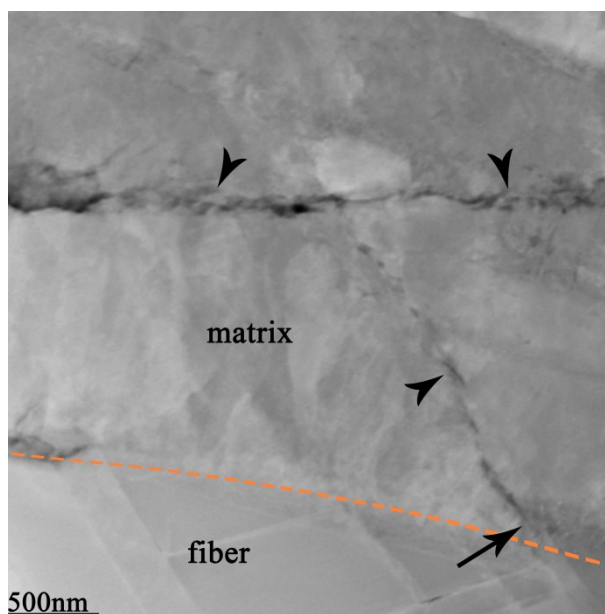

**Fig. S1** HAADF image of deformed matrix in the stone of urchin tooth. Arrowheads indicate crack locations; the black arrow indicates the interruption of a crack at the organic sheath.

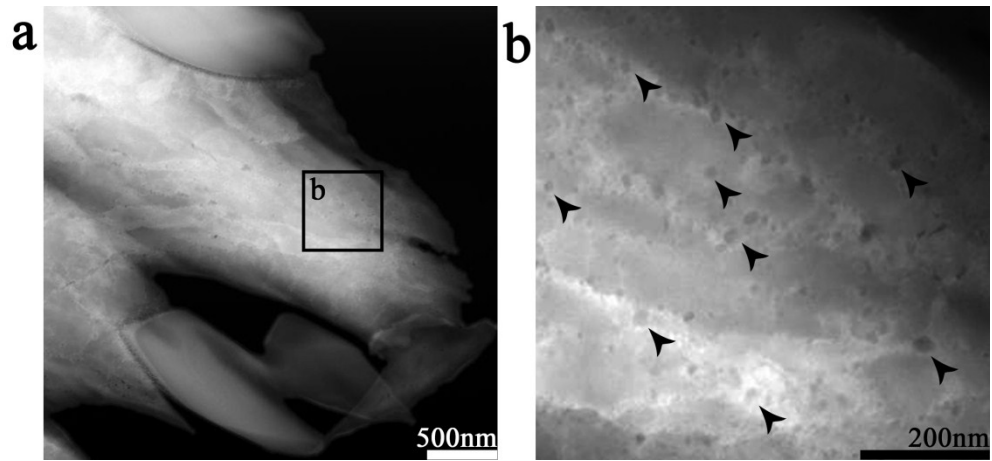

**Fig. S2** Nanostructure of the matrix in the stone of urchin tooth. (a) HAADF image showing the fine-grained characteristics of the matrix. (b) Magnified image of the area enclosed by a box in (a). Black arrowheads indicate the dim maculae, which are the loci of organic inclusions.
